# Supplementary material for: Label-Free Neurosurgical Pathology with Stimulated Raman Imaging
Source: Oxford University Press journal article supplement (doi:10.1158/0008-5472.can-16-0270), 2016-04-12
Supplement: 00085472can160270-sup-161566_1_supp_3425244_v4t300.docx [file 00085472can160270-sup-161566_1_supp_3425244_v4t300.docx]

**Table S2.** Diagnostic features revealed from label-free SRS imaging versus H&E staining of human brain tumors.

| **Pathological features** | **Label-free SRS** | **H&E staining** |
| --- | --- | --- |
| Cell nuclei size and morphology | √ | √ |
| Cell density | √ | √ |
| Necrosis | √ | √ |
| Vascular proliferation | √ | √ |
| Red blood cells | √ | √ |
| White matter and gray matter | √ | Challenging |
| Total lipids (myelin sheath or lipid droplets) | √ | Not assessable |
| Total proteins | √ | Not assessable |
| Collagen | √ | Non-specific |
| SRS can image both fresh tissue and frozen sections; H&E staining can only work with tissue sections. | | |
